# Supplementary material
Source: Research Square preprint supplement (doi:10.21203/rs.3.rs-9629813/v1)
Supplement: Supplementary file 1 [file 220df2fe826581f9fb57b69a.docx]

**Supplementary Material 1: The Search Strategy**

PUBMED ADVANCED

((((("subtle cognitive decline"[Title/Abstract]) OR ("subtle cognitive dysfunction"[Title/Abstract])) OR ("subtle cognitive impairment"[Title/Abstract])) OR ("subtle cognitive disturbances"[Title/Abstract])) OR ("subtle cognitive deterioration"[Title/Abstract])) NOT ((animals[mh] NOT humans[mh]))

WEB OF SCIENCE ADVANCED

((((((TI="subtle cognitive decline" OR AB="subtle cognitive decline")) OR ((TI="subtle cognitive dysfunction" OR AB="subtle cognitive dysfunction"))) OR ((TI="subtle cognitive impairment" OR AB="subtle cognitive impairment"))) OR ((TI="subtle cognitive disturbances" OR AB="subtle cognitive disturbances"))) OR ((TI="subtle cognitive deterioration" OR AB="subtle cognitive deterioration"))) NOT ((ALL=animals NOT ALL=humans))

SCOPUS ADVANCED

SCOPUS ADVANCED

( ( TITLE-ABS-KEY ( "subtle cognitive decline" ) OR TITLE-ABS-KEY ( "subtle cognitive dysfunction" ) OR TITLE-ABS-KEY ( "subtle cognitive impairment" ) OR TITLE-ABS-KEY ( "subtle cognitive disturbances" ) OR TITLE-ABS-KEY ( "subtle cognitive deterioration" ) ) ) AND NOT ( ( INDEXTERMS ( animals ) not INDEXTERMS ( humans ) ) )
